# Supplementary material
Source: ML conference proceedings conference paper supplement (https://proceedings.mlr.press/v139/perez-nieves21a.html)
Supplement: Supplementary file 1 [file perez-nieves21a-supp.pdf]

---

**Supplementary Material for  
Modelling Behavioural Diversity for Learning in Open-Ended Games**

---

**Contents**

|          |                                                                       |           |
|----------|-----------------------------------------------------------------------|-----------|
| <b>A</b> | <b>A Review of <math>\alpha</math>-Rank</b>                           | <b>2</b>  |
| <b>B</b> | <b>Algorithm for Open-Ended (Meta-)Game Solvers</b>                   | <b>2</b>  |
| <b>C</b> | <b>The Effectiveness of Our Method on the RPS-X Game</b>              | <b>3</b>  |
| <b>D</b> | <b>Full Proofs</b>                                                    | <b>4</b>  |
| D.1      | Proposition 4 [G-DPP Diversity Metric] . . . . .                      | 4         |
| D.2      | Proposition 5 [Maximum Diversity] . . . . .                           | 4         |
| D.3      | Proposition 6 [Diversity vs. Matrix Norm] . . . . .                   | 5         |
| D.4      | Proposition 7 [Uniqueness of Diverse Best Response] . . . . .         | 6         |
| D.5      | Theorem 8 [Convergence of Diverse FP] . . . . .                       | 7         |
| D.6      | Proposition 9 [Gamescape Enlargement] . . . . .                       | 9         |
| D.7      | Theorem 10 [Convergence of Diverse $\alpha$ -PSRO] . . . . .          | 9         |
| <b>E</b> | <b>Additional Results on Real-World Meta-Games</b>                    | <b>10</b> |
| <b>F</b> | <b>Empirical Result of Frobenius Norm vs. Expected Cardinality</b>    | <b>12</b> |
| <b>G</b> | <b>Hyper-parameter Settings for All Experiments</b>                   | <b>13</b> |
| <b>H</b> | <b>Implementation of Oracles</b>                                      | <b>14</b> |
| H.1      | Pseudocodes . . . . .                                                 | 14        |
| H.2      | Time Complexity: PSRO vs. Diverse PSRO on Normal-Form Games . . . . . | 16        |

## A. A Review of $\alpha$ -Rank

$\alpha$ -Rank (Omidshafiei et al., 2019) is a new type of solution concept that is built on the *response graph* of a game. In particular, it tries to find the so-called *sink strongly-connected components (SSCC)* nodes on the response graph that have only incoming edges but no outgoing edges.  $\alpha$ -Rank serves as a promising replacement for NE; the key associated benefits are its uniqueness, and its polynomial-time solvability in multi-player general-sum games.

On the response graph, each joint pure-strategy profile is a node, and a directed edge points from node  $\sigma \in \mathbb{S}$  to node  $S \in \mathbb{S}$  if 1)  $\sigma$  and  $S$  differ in only one single player’s strategy, and 2) that deviating player, denoted by  $i$ , benefits from deviating from  $S$  to  $\sigma$  such that  $G^i(\sigma) > G^i(S)$ . We are interested in the so-called *sink strongly-connected components (SSCC)* nodes that have only incoming edges but no outgoing edges on the response graph. To find those SSCC nodes,  $\alpha$ -Rank constructs a random walk along the directed response graph, which can be equivalently described by a Markov chain, with the transition probability matrix  $C$  being:

$$C_{S,\sigma} = \begin{cases} \eta \frac{1 - \exp(-\alpha(G^k(\sigma) - G^k(s)))}{1 - \exp(-\alpha m(G^k(\sigma) - G^k(s)))} & \text{if } G^k(\sigma) \neq G^k(S) \\ \frac{\eta}{m} & \text{otherwise} \end{cases}$$

$$C_{S,S} = 1 - \sum_{i \in \mathcal{N}} C_{S,\sigma}$$

In the above Equation,  $\eta = (\sum_{i \in \mathcal{N}} (|S^i| - 1))^{-1}$ ,  $m \in \mathbb{N}$  and  $\alpha > 0$  are three constants. Large  $\alpha$  ensures the Markov chain is irreducible, and thus guarantees the existence and uniqueness of the  $\alpha$ -Rank solution, which is the resulting unique stationary distribution  $\pi$  of the Markov chain,  $C^T \pi = \pi$ . The probability mass of each joint strategy in  $\pi$  can be interpreted as the longevity of that strategy during an evolution process.

## B. Algorithm for Open-Ended (Meta-)Game Solvers

---

### Algorithm 1 A General Solver for Open-Ended (Meta-)Games

---

- 1: **Initialise:** the “high-level” policy set  $\mathbb{S} = \prod_{i \in \mathcal{N}} \mathbb{S}^i$ , the meta-game payoff  $\mathbf{M}, \forall S \in \mathbb{S}$ , and meta-policy  $\pi^i = \text{UNIFORM}(\mathbb{S}^i)$ .
  - 2: **for** iteration  $t \in \{1, 2, \dots\}$  **do:**
  - 3:   **for** each player  $i \in \mathcal{N}$  **do:**
  - 4:     Compute the meta-policy  $\pi_t$  by meta-game solver  $\mathcal{S}(\mathbf{M}_t)$ .
  - 5:     Find a new policy against others by Oracle:  $S_t^i = \mathcal{O}^i(\pi_t^{-i})$ .
  - 6:     Expand  $\mathbb{S}_{t+1}^i \leftarrow \mathbb{S}_t^i \cup \{S_t^i\}$  and update meta-payoff  $\mathbf{M}_{t+1}$ .
  - 7:   **terminate if:**  $\mathbb{S}_{t+1}^i = \mathbb{S}_t^i, \forall i \in \mathcal{N}$ .
  - 8: **Return:**  $\pi$  and  $\mathbb{S}$ .
-

### C. The Effectiveness of Our Method on the RPS-X Game

We show via a worked example why our method will not fail to find the final strategy  $X$  in the RPS-X game, whereas current diversifying methods do fail.<sup>1</sup> Assume that we are in the state of the strategy space being  $\{R, P, S\}$ , we know that  $\text{PSRO}_{rn}$  from this position will fail as the best response strategy is still within  $\{R, P, S\}$  (McAleer et al., 2020). Instead, we show that if we follow our method and select the strategy with the largest expected cardinality as the best response, that strategy  $\{X\}$  will be selected to be added to the population. There are four cases to consider, namely those of adding all four strategies to the current population of strategies:

1. Strategy  $\{R\}$  is added to the population and we have the full strategy set  $\{R, P, S, R\}$ , which induces the following meta-game:

$$\mathbf{M} = \begin{bmatrix} 0 & -1 & 1 & 0 \\ 1 & 0 & -1 & 1 \\ -1 & 1 & 0 & -1 \\ 0 & -1 & 1 & 0 \end{bmatrix}.$$

and the following kernel matrix:

$$\mathcal{L} = \mathbf{M}\mathbf{M}^T = \begin{bmatrix} 2 & -1 & -1 & 2 \\ -1 & 3 & -2 & -1 \\ -1 & -2 & 3 & -1 \\ 2 & -1 & -1 & 2 \end{bmatrix}.$$

which we can use to solve for the expected cardinality:

$$\text{Tr}(\mathbf{I} - (\mathcal{L} + \mathbf{I})^{-1}) = 1.6667$$

2. Strategy  $\{P\}$  is added to the population and we have the full strategy set  $\{R, P, S, P\}$ . The result is the same as that of adding  $\{R\}$  to the population and the expected cardinality is 1.6667.
3. Strategy  $\{S\}$  is added to the population and we have the full strategy set  $\{R, P, S, S\}$ . The result is the same as that of adding  $\{R\}$  to the population and the expected cardinality is 1.6667.
4. Strategy  $\{X\}$  is added to the population and we have the full strategy set  $\{R, P, S, X\}$ , which induces the following meta-game:

$$\mathbf{M} = \begin{bmatrix} 0 & -1 & 1 & -2/5 \\ 1 & 0 & -1 & -2/5 \\ -1 & 1 & 0 & -2/5 \\ 2/5 & 2/5 & 2/5 & 0 \end{bmatrix}.$$

and the following kernel matrix:

$$\mathcal{L} = \mathbf{M}\mathbf{M}^T = \begin{bmatrix} 2.16 & -0.84 & -0.84 & 0 \\ -0.84 & 2.16 & -0.84 & 0 \\ -0.84 & -0.84 & 2.16 & 0 \\ 0 & 0 & 0 & 0.48 \end{bmatrix}.$$

which we can use to solve for the expected cardinality:

$$\text{Tr}(\mathbf{I} - (\mathcal{L} + \mathbf{I})^{-1}) = 2.1486$$

which, due to inducing the largest expected cardinality out of all of the possible options to be added to the population, strategy  $\{X\}$  would be added.

<sup>1</sup>Notably, vanilla PSRO will solve this game in this setting as it will just collapse to the Double Oracle method.

## D. Full Proofs

### D.1. Proposition 4 [G-DPP Diversity Metric]

**Proposition 4 (G-DPP Diversity Metric).** *The diversity metric, defined as the expected cardinality of a G-DPP, can be computed in  $\mathcal{O}(|\mathbb{S}|^3)$  time by the following equation:*

$$\text{Diversity}(\mathbb{S}) = \mathbb{E}_{\mathbf{Y} \sim \mathbb{P}_{\mathcal{L}_{\mathbb{S}}}}[|\mathbf{Y}|] = \text{Tr}(\mathbf{I} - (\mathcal{L}_{\mathbb{S}} + \mathbf{I})^{-1}).$$

**Proof.** *We can calculate the expected cardinality of a DPP sample by an exponential sum over all subsets of  $\mathbb{S}$  as follows (Gillenwater et al., 2018):*

$$\begin{aligned} \mathbb{E}_{\mathbf{Y} \sim \mathbb{P}_{\mathcal{L}_{\mathbb{S}}}}[|\mathbf{Y}|] &= \sum_{\mathbf{Y} \subseteq \mathbb{S}} |\mathbf{Y}| \mathbb{P}_{\mathcal{L}_{\mathbb{S}}}(\mathbf{Y}) \\ &= \sum_{\mathbf{Y} \subseteq \mathbb{S}} |\mathbf{Y}| \frac{\det(\mathcal{L}_{\mathbf{Y}})}{\det(\mathcal{L}_{\mathbb{S}} + \mathbf{I})} \end{aligned}$$

where  $\frac{\det(\mathcal{L}_{\mathbf{Y}})}{\det(\mathcal{L}_{\mathbb{S}} + \mathbf{I})}$  represents the probability of sampling the subset  $\mathbf{Y}$ , and therefore we are taking the sum over the probabilities of sampling all different  $|\mathbf{Y}|$ . Based on the following Lemma from Rising (2013):

**Lemma** (Theorem 2.3.9 in Rising (2013)). *Let  $\mathbf{Y} \sim \text{DPP}(\mathcal{K})$  where  $\mathcal{K} = \mathbf{I} - (\mathcal{L} + \mathbf{I})^{-1}$ , and let  $\{\lambda_i\}_{i=1}^n$  be the eigenvalues of  $\mathcal{K}$ . Then  $|\mathbf{Y}| = \sum_{i=1}^n Z_i$  where  $\{Z_i\}_{i=1}^n$  are independent Bernoulli trials with  $\mathbb{E}[Z_i] = \lambda_i$ .*

we can write the expectation over the random variable  $|\mathbf{Y}|$  by

$$\mathbb{E}_{\mathbf{Y} \sim \mathbb{P}_{\mathcal{L}_{\mathbb{S}}}}[|\mathbf{Y}|] = \mathbb{E}\left[\sum_{i=1}^n Z_i\right] = \sum_{i=1}^n \mathbb{E}[Z_i] = \sum_{i=1}^n \lambda_i = \text{Tr}(\mathcal{K}).$$

Since  $\mathcal{K} = \mathcal{L}(\mathcal{L} + \mathbf{I})^{-1} = \mathbf{I} - (\mathcal{L} + \mathbf{I})^{-1}$  (Kulesza et al., 2012), we can relate the eigenvalues of  $\mathcal{L}$  and  $\mathcal{K}$  as follows,

$$\lambda_i^{\mathcal{K}} = \frac{\lambda_i^{\mathcal{L}}}{\lambda_i^{\mathcal{L}} + 1}, \quad \forall i$$

where the superscript references which matrix the eigenvalues belong to. Finally, we have,

$$\mathbb{E}_{\mathbf{Y} \sim \mathbb{P}_{\mathcal{L}_{\mathbb{S}}}}[|\mathbf{Y}|] = \sum_{i=1}^n \frac{\lambda_i^{\mathcal{L}_{\mathbb{S}}}}{\lambda_i^{\mathcal{L}_{\mathbb{S}}} + 1} = \text{Tr}(\mathbf{I} - (\mathcal{L}_{\mathbb{S}} + \mathbf{I})^{-1})$$

and we have the expected cardinality of a sample from our DPP based upon the kernel matrix  $\mathcal{L}_{\mathbb{S}}$ . ■

### D.2. Proposition 5 [Maximum Diversity]

**Proposition 5 (Maximum Diversity).** *The diversity of a population  $\mathbb{S}$  is bounded by  $\text{Diversity}(\mathbb{S}) \leq \text{rank}(\mathbf{M})$ , and if  $\mathbf{M}$  is normalised (i.e.,  $\|\mathbf{M}_{[i,:]}\| = 1, \forall i$ ), we have  $\text{Diversity}(\mathbb{S}) \leq \text{rank}(\mathbf{M})/2$ . In both cases, maximal diversity is reached if and only if  $\mathbf{M}$  is orthogonal.*

**Proof.** *We start from the the case of an un-normalised meta-game. We can always do the SVD decomposition of  $\mathbf{M}$  and get*

$$\mathbf{M} = \mathbf{U}\Sigma\mathbf{V}^{\top}$$

Then, the kernel  $\mathcal{L}$  of G-DPP can be written as

$$\mathcal{L} = \mathbf{M}\mathbf{M}^{\top} = (\mathbf{U}\Sigma\mathbf{V}^{\top})(\mathbf{U}\Sigma\mathbf{V}^{\top})^{\top} = \mathbf{U}\Sigma^2\mathbf{U}^{\top}$$

This means that the eigenvalues of  $\mathcal{L}$  are  $\lambda_i = \sigma_i^2 > 0$  where  $\sigma_i$  are the entries of the diagonal of  $\Sigma$ . Thus, based on Proposition 4, we can write the expected cardinality given kernel  $\mathcal{L}$  as

$$\mathbb{E}_{\mathbf{Y} \sim \mathbb{P}_{\mathcal{L}_{\mathbb{S}}}}[|\mathbf{Y}|] = \sum_i \frac{\lambda_i}{\lambda_i + 1} = \sum_i \frac{\sigma_i^2}{\sigma_i^2 + 1}.$$

This implies that all eigenvalues are positive and thus, a larger cardinality can only be achieved by either adding more eigenvalues or making the eigenvalues larger. Since we can only get a maximum of  $n = \text{rank}(\mathbf{M})$  non-zero eigenvalues, making the eigenvalues larger will increase the terms of the summation by  $\frac{\lambda_i}{\lambda_i + 1} < 1$  which means that

$$\sup \mathbb{E}_{\mathbf{Y} \sim \mathbb{P}_{\mathcal{L}_{\mathbb{S}}}}[|\mathbf{Y}|] = \text{rank}(\mathbf{M})$$

Thus, the maximum achievable diversity is obtained when population  $\mathbb{S}$  makes  $\mathbf{M}$  full rank and  $\lambda_i \rightarrow \infty, \forall i$ .

We now prove the case for a normalised (i.e.,  $\|\mathbf{M}_{[i,:]} \| = 1, \forall i$ ) meta-game. We first show that a DPP is maximised over orthogonal feature vectors. To do this we show that the probability of sampling the whole set of agents is maximised for orthogonal vectors. Starting by noting Hadamard's Inequality, it states that if  $\mathbf{N}$  is the matrix having columns  $v_i$ , then

$$|\det(\mathbf{N})| \leq \prod_{i=1}^n \|v_i\|,$$

where notably equality holds if and only if the vectors  $v_i$  are orthogonal. Therefore, by this inequality we also know that the determinant of  $\mathbf{M}$  is maximised when the payoffs are orthogonal for each agent, as this allows the equality to hold.

Additionally, as we define our  $\mathbf{M}$  to be a square matrix of size  $M \times M$ , we can decompose the determinant of  $\mathcal{L}$  as,

$$\det(\mathcal{L}_{\mathcal{Y}}) = \det(\mathbf{M}\mathbf{M}^T) = \det(\mathbf{M}) \det(\mathbf{M}^T) = \det(\mathbf{M})^2$$

and therefore we know that  $\det(\mathcal{L}_{\mathcal{Y}})$  is maximised whenever  $\det(\mathbf{M})$  is maximised. According to the following equation,

$$\mathbb{P}_{\mathcal{L}}(\mathbf{Y} = \mathcal{Y}) \propto \det(\mathcal{L}_{\mathcal{Y}})$$

we therefore have that the probability of sampling the whole ground set is maximised when the  $\det(\mathcal{L}_{\mathcal{Y}})$  is maximised, which coincides with the orthogonality of  $\mathbf{M}$ .

Finally, based on the fact that orthogonal feature vectors maximise the diversity of a population, we show that a meta-game with orthogonal feature vectors will receive an expected cardinality value of  $\frac{n}{2}$ .

We know that the entries of our kernel  $\mathcal{L}$  are simply  $L_{ij} = \mathbf{w}_i \mathbf{w}_j^T$ . As long as  $\|\mathbf{w}_i\| = 1, \forall i$  it will be the case that  $L_{ii} = 1$ . Additionally, as we have stated that the rows of the meta game are orthogonal,  $\mathbf{w}_i \mathbf{w}_j^T = 0, \forall i, j$ , so all off-diagonal entries  $L_{ij} = 0$ . For example, the kernel  $\mathcal{L}$  for a meta game of size 3 would be,

$$\mathcal{L} = \begin{bmatrix} 1 & 0 & 0 \\ 0 & 1 & 0 \\ 0 & 0 & 1 \end{bmatrix},$$

which is obviously the identity matrix of size  $M$ . The identity matrix has  $M$  eigenvalues of 1, and therefore we have

$$\mathbb{E}_{\mathbf{Y} \sim \mathbb{P}_{\mathcal{L}_{\mathcal{S}}}}[|\mathbf{Y}|] = \sum_{i=1}^n \frac{\lambda_i^{\mathcal{L}}}{\lambda_i^{\mathcal{L}} + 1} = \sum_{i=1}^n \frac{1}{2} = \frac{n}{2}.$$

As the expected cardinality is maximised for orthogonal feature vectors, and we know that orthogonal feature vectors will return an expected cardinality of  $\frac{n}{2}$ , we know that when our feature vectors are normalised this is the max achievable expected cardinality. ■

### D.3. Proposition 6 [Diversity vs. Matrix Norm]

**Proposition 6 (Diversity vs. Matrix Norm).** Maximising the diversity in Eq. (11) also maximises the Frobenius norm of  $\|\mathbf{M}\|_F$ , but NOT vice versa.

**Proof.** Based on Proposition 5, the maximum achievable diversity is:

$$\sup \mathbb{E}_{\mathbf{Y} \sim \mathbb{P}_{\mathcal{L}_{\mathcal{S}}}}[|\mathbf{Y}|] = \sup \sum_i \frac{\lambda_i}{\lambda_i + 1} = \text{rank}(\mathbf{M}) = n$$

Since the terms in the above summation are  $0 \leq \frac{\lambda_i}{\lambda_i + 1} < 1$ , the expected cardinality is also maximised for  $\lambda_i \rightarrow \infty, \forall n$ . Therefore, we have that the maximum achievable diversity is attained when the eigenvalues of  $\mathcal{L}$  are maximised and that  $\text{rank}(\mathbf{M}) = n$ . In a G-DPP, we have that the kernel matrix is defined as  $\mathcal{L} = \mathbf{M}\mathbf{M}^T$ , and the Frobenius norm is written as

$$\begin{aligned} \|\mathbf{M}\|_F &= \sqrt{\sum_{i=1}^n \sum_{j=1}^n |\mathbf{M}_{ij}|^2} = \sqrt{\text{Tr}(\mathbf{M}\mathbf{M}^T)} \\ &= \sqrt{\text{Tr}(\mathcal{L})} \\ &= \sqrt{\sum_{i=1}^n \lambda_i} \end{aligned}$$

We have shown above that maximising the expected cardinality of  $\mathcal{L}$  is achieved by maximising the eigenvalues of  $\mathcal{L}$  and it

directly follows that:

$$\sup \|\mathbf{M}\|_F = \sup \sqrt{\sum_{i=1}^n \lambda_i}$$

is achieved as  $\lambda_i \rightarrow \infty, \forall i$ .

Now we allude to why maximising  $\|\mathbf{M}\|_F$  will not necessarily lead to a large diversity of agents (i.e., the opposite direction of this proposition is not necessarily correct), but our measure based upon expected cardinality will. Firstly, note that given

$$\|\mathbf{M}\|_F = \sqrt{\sum_{i=1}^n \lambda_i},$$

an optimiser may go about increasing this function in two manners. One manner may be to continually add new eigenvalues which will help improve the overall diversity of  $\mathbf{M}$ . However, an optimiser may also increase this norm by focusing on one eigenvalue, or a subset of eigenvalues, and increase those to be as large as possible. Our major worry here would be that by focusing on a subset of eigenvalues, new agents that are added to the population may be redundant as they are added to increase the current set of eigenvalues - not to bring in new non-zero eigenvalues. This would lead to a lack of diversity in the population. On the other hand, note the formula for expected cardinality is,

$$\mathbb{E}_{\mathbf{Y} \sim \mathbb{P}_{\mathcal{L}_S}} [|\mathbf{Y}|] = \sum_i \frac{\lambda_i}{\lambda_i + 1}$$

and note how each eigenvalue can at most contribute a value of 1 to the expected cardinality value. The importance of this is that an optimiser will gain less marginal benefit from increasing an already large eigenvalue than it would from adding a new non-zero eigenvalue to the meta game. Therefore, whilst we can guarantee that our expected cardinality measure will always search for new non-zero eigenvalues (and by that notion, more diverse agents), we can not guarantee the same for the Frobenius norm measure. ■

#### D.4. Proposition 7 [Uniqueness of Diverse Best Response]

**Proposition 7 (Uniqueness of Diverse Best Response).** Eq. (11) is a strictly concave function. The resulting best response in Eq. (12) has a unique solution.

**Proof.** We study the sign of the second derivative of the diversity measure (Eq.(11)) in a neighbourhood of the positive semidefinite symmetric matrix  $\mathcal{L}$ . We apply a perturbation to  $\mathcal{L}$  such that  $\tilde{\mathcal{L}} = \mathcal{L} + \varepsilon \mathbf{A}$  with  $\mathbf{A}$  being a symmetric matrix and  $\varepsilon \in \mathbb{R}$ , as a result, what we need to show is:

$$\left. \frac{\partial^2}{\partial \varepsilon^2} \text{Tr} \left( \mathbf{I} - (\tilde{\mathcal{L}} + \mathbf{I})^{-1} \right) \right|_{\varepsilon=0} < 0$$

First, we notice that

$$\mathbf{I} - (\tilde{\mathcal{L}} + \mathbf{I})^{-1} = \mathbf{I} - \sum_{n=0}^{\infty} (-1)^n (\tilde{\mathcal{L}})^n = - \sum_{n=1}^{\infty} (-1)^n (\tilde{\mathcal{L}})^n = \sum_{n=0}^{\infty} (-1)^n (\mathcal{L} + \varepsilon \mathbf{A})^{n+1}$$

where we used the matrix expansion  $(\mathbf{I} + \tilde{\mathcal{L}})^{-1} = \sum_{n=0}^{\infty} (-1)^n \tilde{\mathcal{L}}^n$ . We can always ensure  $\|\tilde{\mathcal{L}}\|_F < 1$  by choosing  $\varepsilon$  small enough and redefining  $\mathcal{L} := \frac{\mathcal{L}}{\|\mathcal{L}\|_F + \beta}$ ,  $\beta > 0 \in \mathbb{R}$  if necessary. We note that after this modification  $\mathcal{L}$  remains a legitimate matrix for a DPP due to being positive semidefinite, and do not affect the rankings of agents. Then,

$$\begin{aligned} \left. \frac{\partial^2}{\partial \varepsilon^2} \left( \mathbf{I} - (\tilde{\mathcal{L}} + \mathbf{I})^{-1} \right) \right|_{\varepsilon=0} &= \left. \frac{\partial^2}{\partial \varepsilon^2} \sum_{n=0}^{\infty} (-1)^n (\mathcal{L} + \varepsilon \mathbf{A})^{n+1} \right|_{\varepsilon=0} \\ &= \sum_{n=0}^{\infty} (-1)^n \left. \frac{\partial^2}{\partial \varepsilon^2} (\mathcal{L} + \varepsilon \mathbf{A})^{n+1} \right|_{\varepsilon=0} \\ &= \frac{1}{2} \mathbf{A}^2 \sum_{n=0}^{\infty} (-1)^n (n+1)(n) \mathcal{L}^{n-1} + \frac{1}{2} \sum_{n=0}^{\infty} (-1)^n (n+1)(n) \mathcal{L}^{n-1} \mathbf{A}^2 \end{aligned} \quad (1)$$

The series  $\sum_{n=0}^{\infty} (-1)^n (n+1)(n) \mathcal{L}^{n-1}$  can be written as

$$\begin{aligned}
 \sum_{n=0}^{\infty} (-1)^n (n+1)(n) \mathcal{L}^{n-1} &= \sum_{n=0}^{\infty} (-1)^{n+1} (n+2)(n+1) \mathcal{L}^n \\
 &= - \sum_{n=0}^{\infty} (-1)^{n+2} \frac{\partial^2}{\partial \mathcal{L}^2} \mathcal{L}^{n+2} \\
 &= - \frac{\partial^2}{\partial \mathcal{L}^2} \sum_{n=0}^{\infty} (-1)^{n+2} \mathcal{L}^{n+2} \\
 &= - \frac{\partial^2}{\partial \mathcal{L}^2} (\mathcal{L}^2 - \mathcal{L}^3 + \mathcal{L}^4 - \dots) \\
 &= - \frac{\partial^2}{\partial \mathcal{L}^2} ((\mathbf{I} + \mathcal{L})^{-1} + \mathcal{L} - \mathbf{I}) \\
 &= -2(\mathbf{I} + \mathcal{L})^{-3}
 \end{aligned}$$

where we used the matrix expansion  $(\mathbf{I} + \mathcal{L})^{-1} = \sum_{n=0}^{\infty} (-1)^n \mathcal{L}^n$  which holds under the modifications specified before.

Finally, we obtain that

$$\begin{aligned}
 \frac{\partial^2}{\partial \varepsilon^2} \text{Tr} \left( \mathbf{I} - (\tilde{\mathcal{L}} + \mathbf{I})^{-1} \right) \Big|_{\varepsilon=0} &= \text{Tr} \left( \frac{\partial^2}{\partial \varepsilon^2} \left( \mathbf{I} - (\tilde{\mathcal{L}} + \mathbf{I})^{-1} \right) \right) \Big|_{\varepsilon=0} \\
 &= - \text{Tr} \left( \mathbf{A}^2 (\mathbf{I} + \mathcal{L})^{-3} + (\mathbf{I} + \mathcal{L})^{-3} \mathbf{A}^2 \right) \\
 &< 0
 \end{aligned}$$

Where the last inequality comes from the fact that both  $(\mathbf{I} + \mathcal{L})^{-3}$  and  $\mathbf{A}^2$  are positive definite and the trace of the product of two positive definite matrices is positive. We therefore have shown that the expected cardinality is a strictly concave function, which are known to have a unique optimiser. ■

## D.5. Theorem 8 [Convergence of Diverse FP]

**Theorem 8 (Convergence of Diverse FP).** *The perturbation sequence induced by diverse FP process is a uniformly bounded martingale difference sequence; therefore, diverse FP shares the same convergence property as GWFP.*

**Proof.** We begin by proving that our perturbation sequence is a martingale sequence w.r.t. the normalised expected cardinality (this has no effect on rankings of agents),

$$X_n = \frac{\mathbb{E}_{\mathbf{Y} \sim \mathbb{P}_{\mathcal{L}_S}} [|\mathbf{Y}|]}{|\mathcal{Y}|}$$

Based on Proposition 5, assuming a normalised payoff table, we know  $0 \leq X_n \leq 0.5$ . We are to show that  $S_n = \frac{1}{n} \sum_{i=1}^n [X_i - \mu]$  where  $\mu = \mathbb{E}[X_n]$  is a martingale sequence by proving that it meets the three conditions listed below one by one.

1.  $S_n$  is a measurable function of  $X_1, X_2, \dots, X_n$

$S_n$  is a measurable function as it is a partial sum of  $\{X_i\}_{i=1}^{\infty}$ .

2.  $\mathbb{E}[|S_n|] < \infty, \forall n$

$$\mathbb{E}[|S_n|] \leq \frac{1}{n} \sum_{i=1}^n \mathbb{E}[|X_i - \mu|] < \infty$$

385 3.  $\mathbb{E}[S_{n+1}|X_1, \dots, X_n] = S_n$

386  
387  
388 
$$\begin{aligned} \mathbb{E}[S_{n+1}|X_1, \dots, X_n] &= \mathbb{E}[S_n + \frac{1}{n}X_{n+1} - \frac{1}{n}\mu] \\ 389 &= S_n + \mathbb{E}[\frac{1}{n}X_{n+1} - \frac{1}{n}\mu|X_1, \dots, X_n] \\ 390 &= S_n - \frac{1}{n}\mu + \mathbb{E}[\frac{1}{n}X_{n+1}|X_1, \dots, X_n] \\ 391 &= S_n - \frac{1}{n}\mu + \frac{1}{n}\mu \\ 392 &= S_n \end{aligned}$$

393 and therefore we have that  $\{S_k\}_{k=1}^\infty$  is a martingale sequence w.r.t.  $\{X_k\}_{k=1}^\infty$ . Now we let  $M_k = S_k - S_{k-1}, k = 2, 3, \dots$   
394 and show that this is a martingale **difference** sequence under the same three conditions.

- 395  
396  
397 1.  $M_k$  is a measurable function of  $X_1, X_2, \dots, X_n$

398 
$$M_k \text{ is measurable as both } S_k \text{ and } S_{k-1} \text{ are.}$$

- 399 2.  $\mathbb{E}[|M_k|] < \infty, \forall k$

400 
$$\mathbb{E}[|M_k|] \leq \mathbb{E}[|S_k|] + \mathbb{E}[|S_{k-1}|] < \infty$$

- 401 3.  $\mathbb{E}[M_{k+1}|X_1, \dots, X_n] = 0$

402  
403  
404 
$$\begin{aligned} \mathbb{E}[M_{k+1}|X_1, \dots, X_n] &= \mathbb{E}[S_{k+1} - S_k|X_1, \dots, X_n] \\ 405 &= \mathbb{E}[S_{k+1}|X_1, \dots, X_n] - S_k \\ 406 &= S_k - S_k \\ 407 &= 0 \end{aligned}$$

408 and we have shown that  $\{M_k\}_{k=1}^\infty$  is a martingale difference sequence w.r.t.  $\{X_k\}_{k=1}^\infty$ .

409 Next, we show that this martingale sequence is bounded uniformly in L2.  $M_n$  is said to be bounded in L2 if:

410 
$$\sup_n \mathbb{E}[M_n^2] < \infty$$

411 which can be shown due to the following:

412 
$$\sup_n \mathbb{E}[M_n^2] = \sup_n \mathbb{E}\left[\frac{1}{n} \sum_{i=1}^n [X_i - \mu]^2\right] < \infty$$

413 as  $\frac{1}{n} \sum_{i=1}^n [X_i - \mu]^2 \leq 0.25, \forall n$

414 where the last line holds due to  $0 \leq X_i \leq 0.5$ . Therefore, if  $M_n \in L2$ , then the martingale sequence  $M$  is bounded in L2 if  
415 and only if:

416 
$$\sum_{k \geq 1} \mathbb{E}[(M_k - M_{k-1})^2] < +\infty$$

417 which we can show in the following manner:

418 
$$\begin{aligned} \sum_{k \geq 1} \mathbb{E}[(M_k - M_{k-1})^2] &= \sum_{k \geq 1} [\mathbb{E}[M_k^2 - 2M_k M_{k-1} + M_{k-1}^2]] \\ 420 &= \sum_{k \geq 1} [\mathbb{E}[M_k^2] + \mathbb{E}[M_{k-1}^2] - \mathbb{E}[2M_k M_{k-1}]] \\ 421 &= \sum_{k \geq 1} [\mathbb{E}[M_k^2] + \mathbb{E}[M_{k-1}^2]] \\ 422 &< \infty \end{aligned}$$

385  
386  
387  
388  
389  
390  
391  
392  
393  
394  
395  
396  
397  
398  
399  
400  
401  
402  
403  
404  
405  
406  
407  
408  
409  
410  
411  
412  
413  
414  
415  
416  
417  
418  
419  
420  
421  
422  
423  
424  
425  
426  
427  
428  
429  
430  
431  
432  
433  
434  
435  
436  
437  
438  
439



440 as  $M_k \in L2, \forall k$ . where we note that  $\mathbb{E}[2M_k M_{k-1}] = 0$  due to the martingale difference sequence properties of  $M_k$ .  
 441 Finally, as we satisfy both of the conditions of GWFP, namely that our expected cardinality function is strictly concave as  
 442 shown in Proposition 7 and the perturbation meets the condition of Eq. (5) we have that as  $\tau \rightarrow 0$  our diverse FP process  
 443 will almost surely result in a GWFP process, which are known to converge in two-player zero-sum games and potential  
 444 games (Leslie & Collins, 2006). ■

#### 445 D.6. Proposition 9 [Gamescape Enlargement]

446 **Proposition 9 (Gamescape Enlargement).** Adding a new best-response policy  $S_\theta$  via Eq. (13) strictly enlarges the  
 447 gamescape. Formally, we have

$$448 \text{Gamescape}(\mathbb{S}) \subsetneq \text{Gamescape}(\mathbb{S} \cup \{S_\theta\})$$

449 **Proof.** According to Proposition 5 and Proposition 7, maximising the expected cardinality of the DPP implies there exists a  
 450 unique solution that makes the meta-game payoff table  $\mathbf{M}$  full rank and increases the eigenvalues. If  $\mathbf{M}$  is full rank, this  
 451 means that the new row in the meta game  $\mathbf{M}$  corresponding to the new policy  $S_\theta$  must be linearly independent to the other  
 452 rows and thus it must not be a convex combination of the other rows, as a result, the gamescape is strictly enlarged. Such a  
 453 result is also expected because the diversity in terms of expected cardinality promotes orthogonality, which is a stronger  
 454 property than linear independency. ■

#### 455 D.7. Theorem 10 [Convergence of Diverse $\alpha$ -PSRO]

456 **Theorem 10 (Convergence of Diverse  $\alpha$ -PSRO).** Diverse  $\alpha$ -PSRO with the Oracle of Eq. (14) converges to the sub-cycle  
 457 of the unique SSCC in the two-player symmetric games.

458 **Proof.** Our proof follows the same argument as (Muller et al., 2019) Proposition 3, which can be adapted in the content of  
 459 our diverse PBR oracle in Eq. (14). The uniqueness of the SSCC follows from the fact that in the single-population case,  
 460 the response graph is fully-connected. Suppose at termination of  $\alpha$ -DPP, the  $\alpha$ -population contains no strategy within the  
 461 SSCC, and let  $s$  be a strategy in the  $\alpha$ -DPP population. We claim that  $s$  attains a higher value for the objective defining the  
 462  $\alpha$ -DPP oracle than any strategy in the  $\alpha$ -DPP population, which contradicts the fact that  $\alpha$ -DPP has terminated. By virtue  
 463 of being in the SSCC we have that  $M^1(s, s') > M^2(s', s)$  for all  $s'$  outside the SSCC, and in particular for all  $s' \in \mathbb{S}_t^i$ ,  
 464 thus the PBR objective for  $s$  is 1.

465 If a member of the underlying game's SSCC appears in the  $\alpha$ -DPP population, this member will induce its own meta-SSCC  
 466 in the meta game's response graph which will have positive probability under the  $\alpha$ -Rank distribution for the meta-game,  
 467 and the DPP oracle for this meta-SSCC will always return a member of the underlying game's SSCC. This is because the  
 468 only strategies that receive a non-zero quality score are those that are members of the underlying game's SSCC, and we  
 469 ignore strategies with a quality of zero. If the only strategy that returns a non-zero quality score, which must be a member of  
 470 the SSCC, is already in the population, the corresponding meta-SSCC already contains a cycle of the underlying SSCC.  
 471 Note that if the meta-SSCC does not contain a cycle, it must be a singleton. Either this singleton is equal to the full SSCC of  
 472 the underlying game (in which we have  $\alpha$ -fully converged), or it is not, in which case the DPP oracle must return a new  
 473 strategy from the underlying SSCC, contradicting our assumption that it has terminated. ■

440  
441  
442  
443  
444  
445  
446  
447  
448  
449  
450  
451  
452  
453  
454  
455  
456  
457  
458  
459  
460  
461  
462  
463  
464  
465  
466  
467  
468  
469  
470  
471  
472  
473  
474  
475  
476  
477  
478  
479  
480  
481  
482  
483  
484  
485  
486  
487  
488  
489  
490  
491  
492  
493  
494

E. Additional Results on Real-World Meta-Games

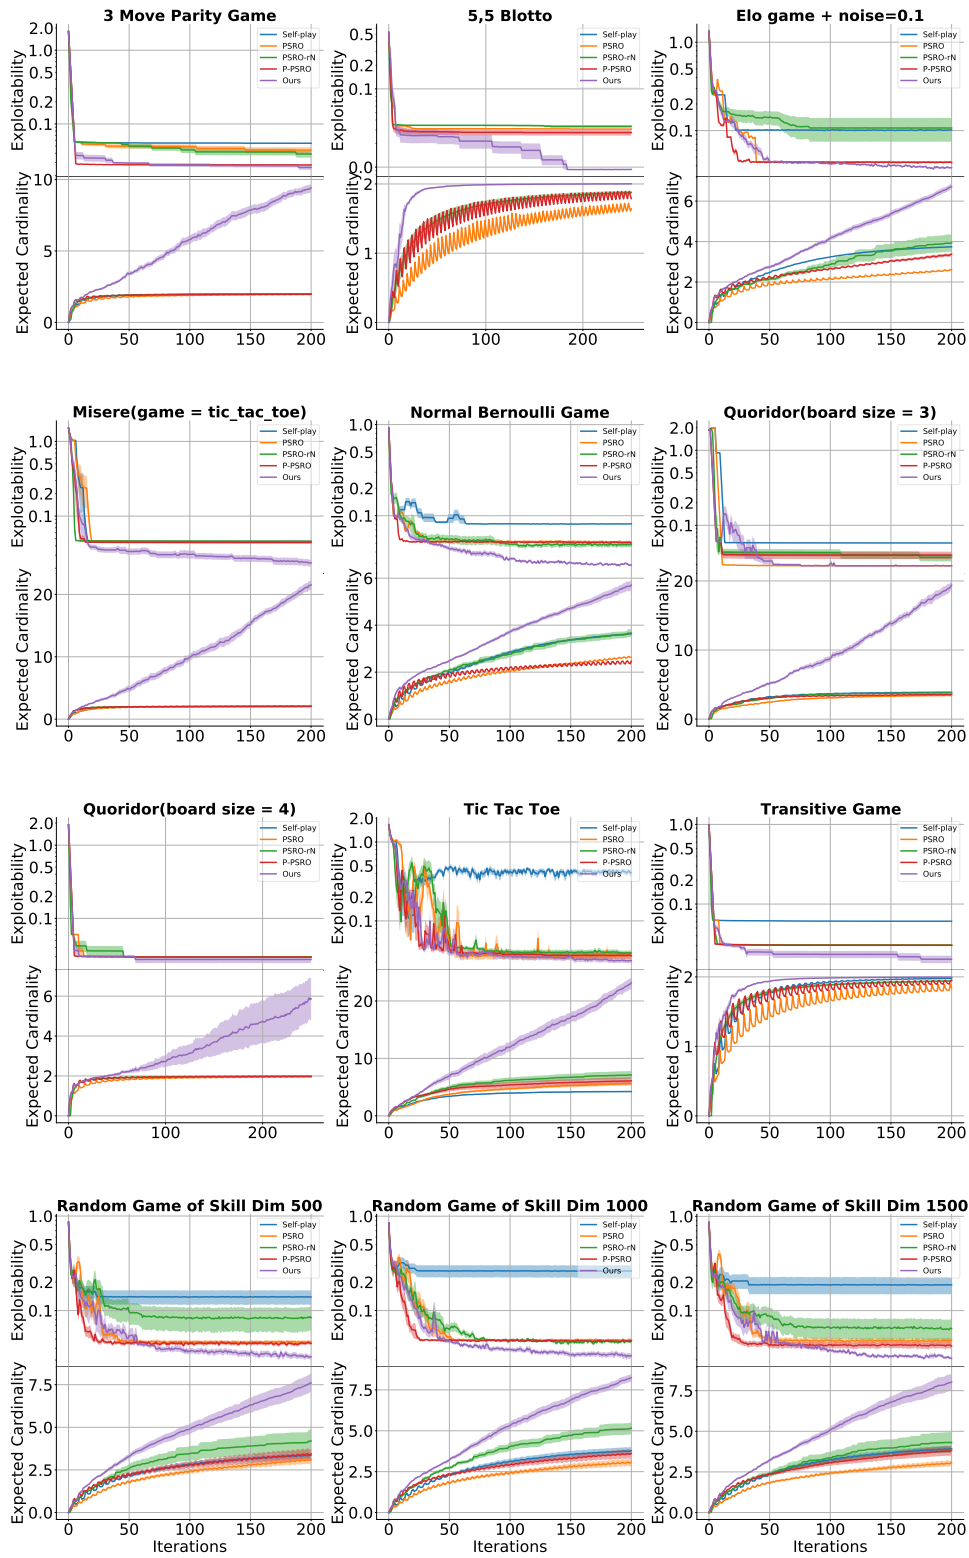

495  
496  
497  
498  
499  
500  
501  
502  
503  
504  
505  
506  
507  
508  
509  
510  
511  
512  
513  
514  
515  
516  
517  
518  
519  
520  
521  
522  
523  
524  
525  
526  
527  
528  
529  
530  
531  
532  
533  
534  
535  
536  
537  
538  
539  
540  
541  
542  
543  
544  
545  
546  
547  
548  
549

550  
551  
552  
553  
554  
555  
556  
557  
558  
559  
560  
561  
562  
563  
564  
565  
566  
567  
568  
569  
570  
571  
572  
573  
574  
575  
576  
577  
578  
579  
580  
581  
582  
583  
584  
585  
586  
587  
588  
589  
590  
591  
592  
593  
594  
595  
596  
597  
598  
599  
600  
601  
602  
603  
604

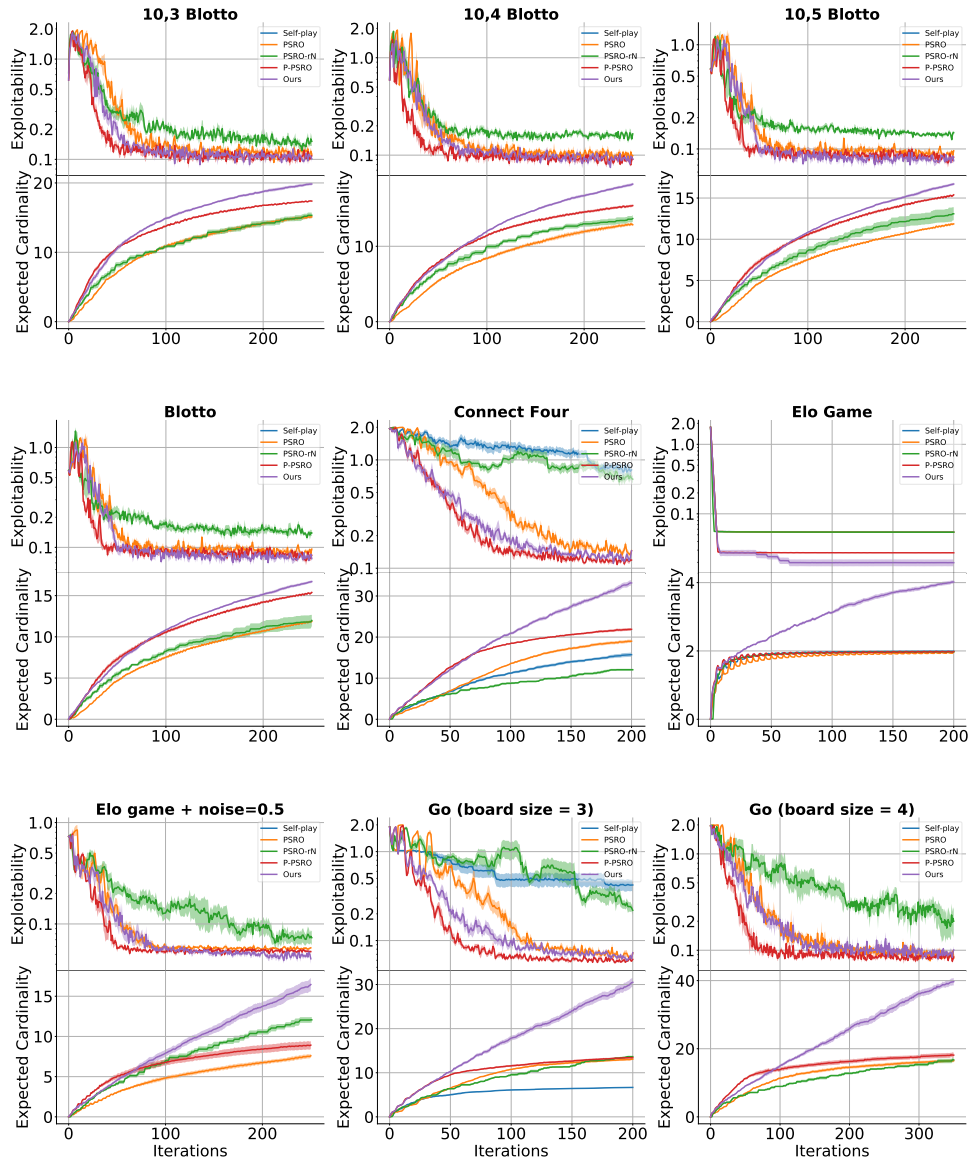

## F. Empirical Result of Frobenius Norm vs. Expected Cardinality

We illustrate here a counter-example of when replacing our expected cardinality term in Eq. (13) with a Frobenius norm measure on the meta-game  $\mathbf{M}$  over the population  $\mathbb{S}^1 \cup \{S_\theta\}$  will fail to improve both the expected cardinality of  $\mathbf{M}$  and so be unable to break the exploitability plateau of PSRO.

Specifically, we use a 150 dimensional Random Game of Skill (Czarnecki et al., 2020) where 25 of the strategies in the underlying game are particularly bad. In this setting, the Frobenius norm struggles as the poor-performing strategies all induce a large norm, and are therefore selected to be added to  $\mathbb{S}^1$ . On the other hand, at worst our expected cardinality measure will select one of these poor-performing strategies, but the remaining poor strategies are no longer diverse and are not selected. Therefore, whilst we suspect the Frobenius norm measure can work as a diversity measure, it is not as general as our metric and can fail under some circumstances, i.e. poor-performing strategies in the underlying game.

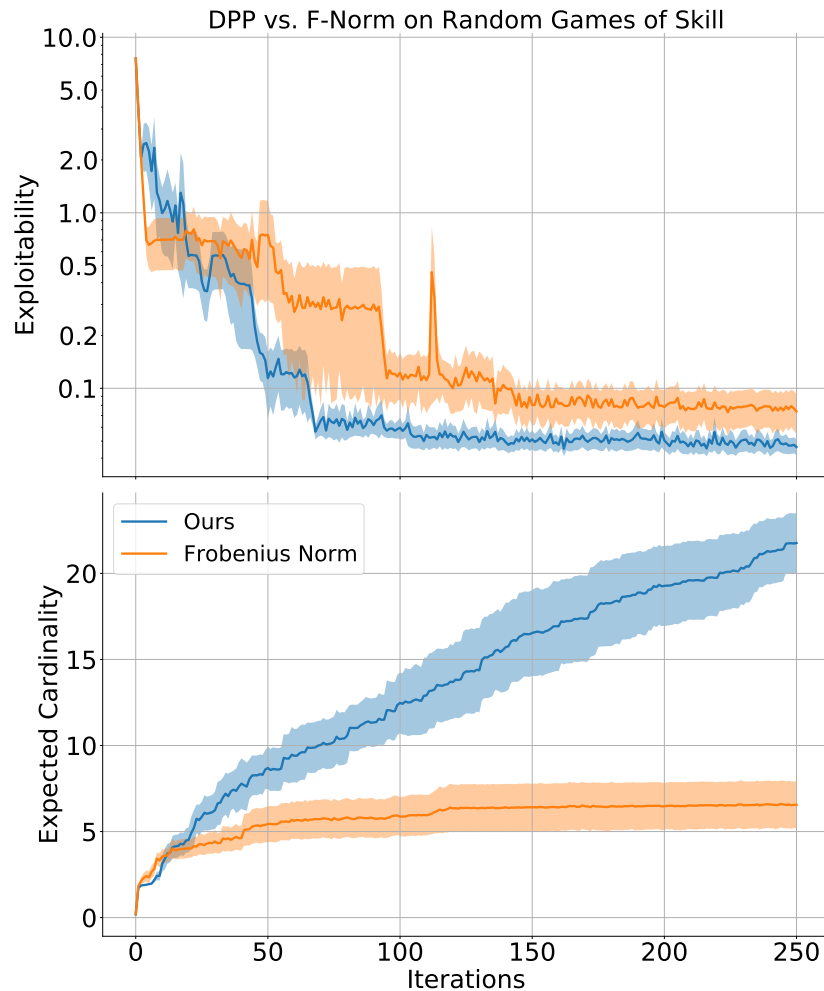

## G. Hyper-parameter Settings for All Experiments

The code can be found in: <https://github.com/oslumbers/diverse-psro>

Table 1. Hyper-parameter settings for our diverse-PSRO method vs. other baselines on four experiments.

| SETTINGS                            | VALUE                                                                                                                                                                                                                                                                                                                          | DESCRIPTION                            |
|-------------------------------------|--------------------------------------------------------------------------------------------------------------------------------------------------------------------------------------------------------------------------------------------------------------------------------------------------------------------------------|----------------------------------------|
| <b>REAL-WORLD META-GAMES</b>        |                                                                                                                                                                                                                                                                                                                                |                                        |
| ORACLE METHOD                       | DIVERSE BEST RESPONSE                                                                                                                                                                                                                                                                                                          | SUBROUTINE OF GETTING ORACLES          |
| LEARNING RATE                       | 0.5                                                                                                                                                                                                                                                                                                                            | LEARNING RATE FOR AGENTS               |
| IMPROVEMENT THRESHOLD               | 0.03                                                                                                                                                                                                                                                                                                                           | CONVERGENCE CRITERIA                   |
| METASOLVER                          | FICTITIOUS PLAY                                                                                                                                                                                                                                                                                                                | METASOLVER METHOD                      |
| METASOLVER ITERATIONS               | 1000                                                                                                                                                                                                                                                                                                                           | # ITERATIONS FOR METASOLVER            |
| # OF THREADS IN PIPELINE            | 2                                                                                                                                                                                                                                                                                                                              | # LEARNERS IN PIPELINE PSRO            |
| # OF SEEDS                          | 10                                                                                                                                                                                                                                                                                                                             | # TRIALS                               |
| DPP WEIGHTING                       | 0.15                                                                                                                                                                                                                                                                                                                           | WEIGHT OF THE DPP BEST RESPONSE        |
| <b>NON-TRANSITIVE MIXTURE MODEL</b> |                                                                                                                                                                                                                                                                                                                                |                                        |
| ORACLE                              | GRADIENT ASCENT                                                                                                                                                                                                                                                                                                                | SUBROUTINE OF GETTING ORACLES          |
| OPTIMIZER                           | ADAM                                                                                                                                                                                                                                                                                                                           | GRADIENT ASCENT OPTIMIZER              |
| LEARNING RATE                       | 0.1                                                                                                                                                                                                                                                                                                                            | LEARNING RATE FOR OPTIMIZER            |
| BETAS                               | (0.9, 0.99)                                                                                                                                                                                                                                                                                                                    | BETAS PARAMETER FOR OPTIMIZER          |
| $\pi^i$                             | $\pi_k^i = \exp(-(x_i - \mu_k)^\top \Sigma (x_i - \mu_k) / 2)$                                                                                                                                                                                                                                                                 | STRATEGY FROM 2D COORDINATES           |
| GAME PAYOFF                         | $\pi^{1,\top} \begin{bmatrix} 0 & 1 & 1 & 1 & -1 & -1 & -1 \\ -1 & 0 & 1 & 1 & 1 & -1 & -1 \\ -1 & -1 & 0 & 1 & 1 & 1 & -1 \\ -1 & -1 & -1 & 0 & 1 & 1 & 1 \\ 1 & -1 & -1 & -1 & 0 & 1 & 1 \\ 1 & 1 & -1 & -1 & -1 & 0 & 1 \\ 1 & 1 & 1 & -1 & -1 & -1 & 0 \end{bmatrix} \pi^2 + \frac{1}{2} \sum_{k=1}^7 (\pi_k^1 - \pi_k^2)$ | PAYOFF FOR $\pi^1$ AGAINST $\pi^2$     |
| $\Sigma$                            | $1/2I$                                                                                                                                                                                                                                                                                                                         | COVARIANCE MATRIX FOR GAUSSIANS        |
| $\mu_1$                             | (2.872, -0.025)                                                                                                                                                                                                                                                                                                                | POSITION OF THE FIRST GAUSSIAN         |
| $\mu_2$                             | (1.8105, 2.2298)                                                                                                                                                                                                                                                                                                               | POSITION OF THE SECOND GAUSSIAN        |
| $\mu_3$                             | (1.8105, -2.2298)                                                                                                                                                                                                                                                                                                              | POSITION OF THE THIRD GAUSSIAN         |
| $\mu_4$                             | (-0.61450, 2.8058)                                                                                                                                                                                                                                                                                                             | POSITION OF THE FOURTH GAUSSIAN        |
| $\mu_5$                             | (-0.61450, -2.8058)                                                                                                                                                                                                                                                                                                            | POSITION OF THE FIFTH GAUSSIAN         |
| $\mu_6$                             | (-2.5768, 1.2690)                                                                                                                                                                                                                                                                                                              | POSITION OF THE SIXTH GAUSSIAN         |
| $\mu_7$                             | (-2.5768, -1.2690)                                                                                                                                                                                                                                                                                                             | POSITION OF THE SEVENTH GAUSSIAN       |
| STRATEGY INITIALISATION VARIANCE    | $0.1^2$                                                                                                                                                                                                                                                                                                                        | VARIANCE OF GAUSSIAN DISTRIBUTION AT 0 |
| METASOLVER                          | FICTITIOUS PLAY                                                                                                                                                                                                                                                                                                                | METASOLVER METHOD                      |
| METASOLVER ITERATIONS               | 1000                                                                                                                                                                                                                                                                                                                           | # ITERATIONS FOR METASOLVER            |
| ITERATIONS                          | 50                                                                                                                                                                                                                                                                                                                             | # TRAINING ITERATIONS                  |
| DPP WEIGHT AT ITERATION $t$         | $\frac{0.7}{1 + \exp(-0.25(t - 25))}$                                                                                                                                                                                                                                                                                          | WEIGHT OF THE DPP BEST RESPONSE        |
| # OF THREADS IN PIPELINE            | 4                                                                                                                                                                                                                                                                                                                              | # LEARNERS IN PIPELINE PSRO            |
| # OF SEEDS                          | 10                                                                                                                                                                                                                                                                                                                             | # OF TRIALS                            |
| <b>COLONEL BLOTTO</b>               |                                                                                                                                                                                                                                                                                                                                |                                        |
| ORACLE METHOD                       | ZERO-ORDER                                                                                                                                                                                                                                                                                                                     | SUBROUTINE OF GETTING ORACLES          |
| ORACLE ITERATIONS                   | 50                                                                                                                                                                                                                                                                                                                             | NEW STRATEGIES PER ITERATION           |
| $\mu$                               | 0.1                                                                                                                                                                                                                                                                                                                            | LEARNING RATE                          |
| METASOLVER                          | LINEAR PROGRAMMING                                                                                                                                                                                                                                                                                                             | METASOLVER METHOD                      |
| # OF SEEDS                          | 10                                                                                                                                                                                                                                                                                                                             | # OF TRIALS                            |
| DPP WEIGHT                          | 0.15                                                                                                                                                                                                                                                                                                                           | WEIGHT OF THE DPP BEST RESPONSE        |
| # OF AREAS                          | 3                                                                                                                                                                                                                                                                                                                              | # OF AREAS TO DISTRIBUTE COINS         |
| # OF COINS                          | 10                                                                                                                                                                                                                                                                                                                             | # OF COINS TO DISTRIBUTE               |
| <b><math>\alpha</math>-PSRO</b>     |                                                                                                                                                                                                                                                                                                                                |                                        |
| ORACLE METHOD                       | PBR / DPP-PBR                                                                                                                                                                                                                                                                                                                  | SUBROUTINE OF GETTING ORACLES          |
| METASOLVER                          | $\alpha$ -RANK                                                                                                                                                                                                                                                                                                                 | METASOLVER METHOD                      |
| ITERATIONS                          | 50                                                                                                                                                                                                                                                                                                                             | # OF TRAINING ITERATIONS               |
| # OF SEEDS                          | 20                                                                                                                                                                                                                                                                                                                             | # OF TRIALS                            |
| $\alpha$                            | INFINITE                                                                                                                                                                                                                                                                                                                       | THE $\alpha$ IN $\alpha$ -RANK         |

---

## 715 H. Implementation of Oracles

### 716 H.1. Pseudocodes

---

#### 718 Algorithm 2 Diverse Best Response Oracle

---

```

719 1: Inputs:
720 2: Player Populations  $\mathbb{S}_t = \prod_{i \in \mathcal{N}} \mathbb{S}_t^i$ , with  $S_t^i \in \mathbb{S}_t^i$  parametrised by  $\theta_{S_t^i}$ 
721 3: Metapolicies  $\boldsymbol{\pi}_t = \prod_{i \in \mathcal{N}} \boldsymbol{\pi}_t^i$ 
722 4: Learning rate  $\mu$ 
723 5: Diversity probability  $\lambda$ 
724 6:
725 7: function oracle( $\mathbb{S}_t, \boldsymbol{\pi}_t, \mu, \lambda$ )
726 8:   Compute  $\mathbf{BR}_{qual} = \mathbf{BR}^i(\mathbb{S}_t^{-i}, \boldsymbol{\pi}_t^{-i})$ 
727 9:   for each pure strategy  $P_j$  do:
728 10:     Update meta-payoff  $\mathbf{M}_j = \mathbf{M}(\mathbb{S}_t^i \cup \{P_j\})$ 
729 11:     Compute  $\mathbf{BR}_{div} = \arg \max_{P_j} \left( \text{Tr} (\mathbf{I} - (\mathbf{M}_j \mathbf{M}_j^\top + \mathbf{I})^{-1}) \right)$ .
730 12:     Choose  $\mathbf{BR} = \mathbf{BR}_{div}$  with probability  $\lambda$  else  $\mathbf{BR} = \mathbf{BR}_{qual}$ 
731 13:     Update  $\theta_{S_t^i} = \mu \theta_{S_t^i} + (1 - \mu) \theta_{\mathbf{BR}}$ 
732 14:   Return:  $S_t^i$ 

```

---



---

#### 736 Algorithm 3 Diverse Gradient Ascent Oracle

---

```

737 1: Inputs:
738 2: Player Populations  $\mathbb{S}_t = \prod_{i \in \mathcal{N}} \mathbb{S}_t^i$ , with  $S_t^i \in \mathbb{S}_t^i$  parametrised by  $\theta_{S_t^i}$ 
739 3: Metapolicies  $\boldsymbol{\pi}_t = \prod_{i \in \mathcal{N}} \boldsymbol{\pi}_t^i$ 
740 4: Number of training updates  $N_{train}$ 
741 5: Diversity weight  $\lambda$ 
742 6:
743 7: function oracle( $\mathbb{S}_t, \boldsymbol{\pi}_t, N_{train}, \lambda$ )
744 8:   Randomly initialise a new  $S^{train}$ 
745 9:   for  $j = 1, \dots, N_{train}$ :
746 10:     Compute payoff  $p_j$  of  $S^{train}$ 
747 11:     Compute meta-payoff  $\mathbf{M}_j = \mathbf{M}(\mathbb{S}_t^i \cup \{S^{train}\})$ 
748 12:     Compute diversity  $d_j = \text{Tr} (\mathbf{I} - (\mathbf{M}_j \mathbf{M}_j^\top + \mathbf{I})^{-1})$ 
749 13:     Compute loss  $l_j = -(1 - \lambda)p_j - \lambda d_j$ 
750 14:     Update  $\theta_{S^{train}}$  to minimise  $l_j$  using a gradient based optimization method
751 15:   Return:  $S^{train}$ 

```

---

753  
754  
755  
756  
757  
758  
759  
760  
761  
762  
763  
764  
765  
766  
767  
768  
769

770  
771  
772  
773  
774  
775  
776  
777  
778  
779  
780  
781  
782  
783  
784  
785  
786  
787  
788  
789  
790  
791  
792  
793  
794  
795  
796  
797  
798  
799  
800  
801  
802  
803  
804  
805  
806  
807  
808  
809  
810  
811  
812  
813  
814  
815  
816  
817  
818  
819  
820  
821  
822  
823  
824

---

**Algorithm 4** Diverse Zero-order Oracle

---

```

1: Inputs:
2: Player Populations  $\mathbb{S}_t = \prod_{i \in \mathcal{N}} \mathbb{S}_t^i$ , with  $S_t^i \in \mathbb{S}_t^i$  parametrised by  $\theta_{S_t^i}$ 
3: Metapolicies  $\boldsymbol{\pi}_t = \prod_{i \in \mathcal{N}} \boldsymbol{\pi}_t^i$ 
4: Learning rate  $\mu$ 
5: Noise parameter  $\sigma$ 
6: Diversity weight  $\lambda$ 
7:
8: function oracle( $\mathbb{S}_t, \boldsymbol{\pi}_t, \mu, \sigma, \lambda$ )
9:   Sample a single  $S_t^i \in \mathbb{S}_t^i$  with probability  $\boldsymbol{\pi}_t^i$ 
10:  for perturbation  $j \in 1, 2, \dots$  do:
11:     $S_j = \text{RandomPerturbation}(S_t^i, \mu, \sigma)$ 
12:    Update meta-payoff  $\mathbf{M}_j = \mathbf{M}(S_t^i \cup \{S_j\})$ 
13:    Compute payoff  $p_j$  of  $S_j$ 
14:    Compute diversity  $d_j = \text{Tr}(\mathbf{I} - (\mathbf{M}_j \mathbf{M}_j^\top + \mathbf{I})^{-1})$ .
15:  Return:  $\arg \max_{S_j} (1 - \lambda)p_j + \lambda d_j$ 
16: function RandomPerturbation( $S_t^i, \mu, \sigma$ )
17:  Generate noise  $\varepsilon \sim \mathcal{N}(0, \sigma^2)$ 
18:  Add noise  $\theta_{S_t^i} = \mu \theta_{S_t^i} + (1 - \mu)\varepsilon$ 
19:  Return  $S_t^i$ 

```

---



---

**Algorithm 5** Diverse Reinforcement Learning Oracle

---

```

1: Inputs:
2: Player Populations  $\mathbb{S}_t = \prod_{i \in \mathcal{N}} \mathbb{S}_t^i$ , with  $S_t^i \in \mathbb{S}_t^i$  parametrised by  $\theta_{S_t^i}$ 
3: Metapolicies  $\boldsymbol{\pi}_t = \prod_{i \in \mathcal{N}} \boldsymbol{\pi}_t^i$ 
4: Learning rate  $\mu$ ,
5: Noise parameter  $\sigma$ ,
6: Diversity weight  $\lambda$ ,
7: function oracle( $\mathbb{S}_t, \boldsymbol{\pi}_t, \mu, \sigma, \lambda$ )
8:  Use an RL algorithm to find  $\mathbf{BR}_{RL} = \mathbf{BR}_{RL}(S_t^{-i}, \boldsymbol{\pi}_t^{-i})$ 
9:  for perturbation  $j \in 1, 2, \dots$  do:
10:     $\mathbf{BR}_j = \text{RandomPerturbation}(\mathbf{BR}_{RL}, \mu, \sigma)$ 
11:    Update meta-payoff  $\mathbf{M}_j = \mathbf{M}(S_t^i \cup \{\mathbf{BR}_j\})$ 
12:    Compute payoff  $p_j$  of  $S_j$ 
13:    Compute diversity  $d_j = \text{Tr}(\mathbf{I} - (\mathbf{M}_j \mathbf{M}_j^\top + \mathbf{I})^{-1})$ .
14:  Return:  $\arg \max_{S_j} (1 - \lambda)p_j + \lambda d_j$ 
15: function RandomPerturbation( $\mathbf{BR}_{RL}, \mu, \sigma$ )
16:  Generate noise  $\varepsilon \sim \mathcal{N}(0, \sigma^2)$ 
17:  Add noise  $\theta_{\mathbf{BR}} = \mu \theta_{\mathbf{BR}_{RL}} + (1 - \mu)\varepsilon$ 
18:  Return  $\mathbf{BR}$ 

```

---

**H.2. Time Complexity: PSRO vs. Diverse PSRO on Normal-Form Games**

**Time Complexity of PSRO on Solving Normal-Form Games**

**Input:** Candidate population  $\Pi \in \mathbb{R}^{P \times D}$ ,  $P \ll D$ , game  $G \in \mathbb{R}^{D \times D}$

1. Compute meta-game  $M = \Pi G \Pi^\top \rightarrow \mathcal{O}(PDP + DDP) = \mathcal{O}(P^2D + D^2P)$
2. Compute metanash  $\pi$  of meta-game  $M \in \mathbb{R}^{P \times P} \rightarrow \mathcal{O}(P^3)$
3. Aggregate the population of strategies  $q = \pi^\top \Pi \rightarrow \mathcal{O}(PD)$
4. **For** each pure strategy  $p_i$  of a total of  $D$  **do**
  - Compute payoff  $p_i G q \rightarrow \mathcal{O}(D^2)$

**Then PSRO takes**  $\mathcal{O}(P^2D + D^2P + P^3 + PD + D^3) = \mathcal{O}(D^3)$

**Time Complexity of Diverse PSRO on Solving Normal-Form Games**

**Input:** Candidate population  $\Pi \in \mathbb{R}^{P \times D}$ ,  $P \ll D$ , game  $G \in \mathbb{R}^{D \times D}$

1. Compute meta-game  $M = \Pi G \Pi^\top \rightarrow \mathcal{O}(PDP + DDP) = \mathcal{O}(P^2D + D^2P)$
2. Compute metanash  $\pi$  of meta-game  $M \in \mathbb{R}^{P \times P} \rightarrow \mathcal{O}(P^3)$
3. Aggregate the population of strategies  $q = \pi^\top \Pi \rightarrow \mathcal{O}(PD)$
4. **For** each pure strategy  $p_i$  of a total of  $D$  **do**
  - Compute payoff  $p_i G q \rightarrow \mathcal{O}(D^2)$
  - Update training strategy resulting in  $\mathbf{BR}_{div} \rightarrow \mathcal{O}(D)$
  - Compute meta-game  $M = \Pi G \Pi^\top \rightarrow \mathcal{O}(PDP + DDP) = \mathcal{O}(P^2D + D^2P)$
  - Compute metanash  $\pi$  of meta-game  $M \in \mathbb{R}^{P \times P} \rightarrow \mathcal{O}(P^3)$
  - Compute  $\mathcal{L} = \mathbf{M} \mathbf{M}^\top \rightarrow \mathcal{O}(P^3)$
  - Compute expected cardinality of  $\mathcal{L}$  in Proposition 4, the complexity is  $\mathcal{O}(P^3)$

**Then Diverse PSRO takes**  $\mathcal{O}(P^2D + D^2P + P^3 + PD + D^3 + D^2 + PD^3 + P^2D^2 + 3P^3) = \mathcal{O}(PD^3)$



**References**

- 880  
881 Czarnecki, W. M., Gidel, G., Tracey, B., Tuyls, K., Omidshafiei, S., Balduzzi, D., and Jaderberg, M. Real world games look  
882 like spinning tops. *arXiv*, pp. arXiv–2004, 2020.  
883
- 884 Gillenwater, J. A., Kulesza, A., Vassilvitskii, S., and Mariet, Z. E. Maximizing induced cardinality under a determinantal  
885 point process. In Bengio, S., Wallach, H., Larochelle, H., Grauman, K., Cesa-Bianchi, N., and Garnett, R. (eds.), *Advances*  
886 *in Neural Information Processing Systems*, volume 31, pp. 6911–6920. Curran Associates, Inc., 2018.  
887
- 888 Kulesza, A., Taskar, B., et al. Determinantal point processes for machine learning. *Foundations and Trends® in Machine*  
889 *Learning*, 5(2–3):123–286, 2012.  
890
- 891 Leslie, D. S. and Collins, E. J. Generalised weakened fictitious play. *Games and Economic Behavior*, 56(2):285–298, 2006.  
892
- 893 McAleer, S., Lanier, J., Fox, R., and Baldi, P. Pipeline psro: A scalable approach for finding approximate nash equilibria in  
894 large games. *arXiv preprint arXiv:2006.08555*, 2020.
- 895 Muller, P., Omidshafiei, S., Rowland, M., Tuyls, K., Perolat, J., Liu, S., Hennes, D., Marris, L., Lanctot, M., Hughes, E., et al.  
896 A generalized training approach for multiagent learning. In *International Conference on Learning Representations*, 2019.  
897
- 898 Omidshafiei, S., Papadimitriou, C., Piliouras, G., Tuyls, K., Rowland, M., Lespiau, J.-B., Czarnecki, W. M., Lanctot, M.,  
899 Perolat, J., and Munos, R.  $\alpha$ -rank: Multi-agent evaluation by evolution. *Scientific reports*, 9(1):1–29, 2019.
- 900 Rising, J. K. Advances in the theory of determinantal point processes. 2013.  
901  
902  
903  
904  
905  
906  
907  
908  
909  
910  
911  
912  
913  
914  
915  
916  
917  
918  
919  
920  
921  
922  
923  
924  
925  
926  
927  
928  
929  
930  
931  
932  
933  
934
